# Supplementary material
Source: Elsevier journal article supplement (https://www.sciencedirect.com/science/article/pii/S001425652030240X)

Figure S1. Funnel plot for assessing reporting bias for mean incubation period

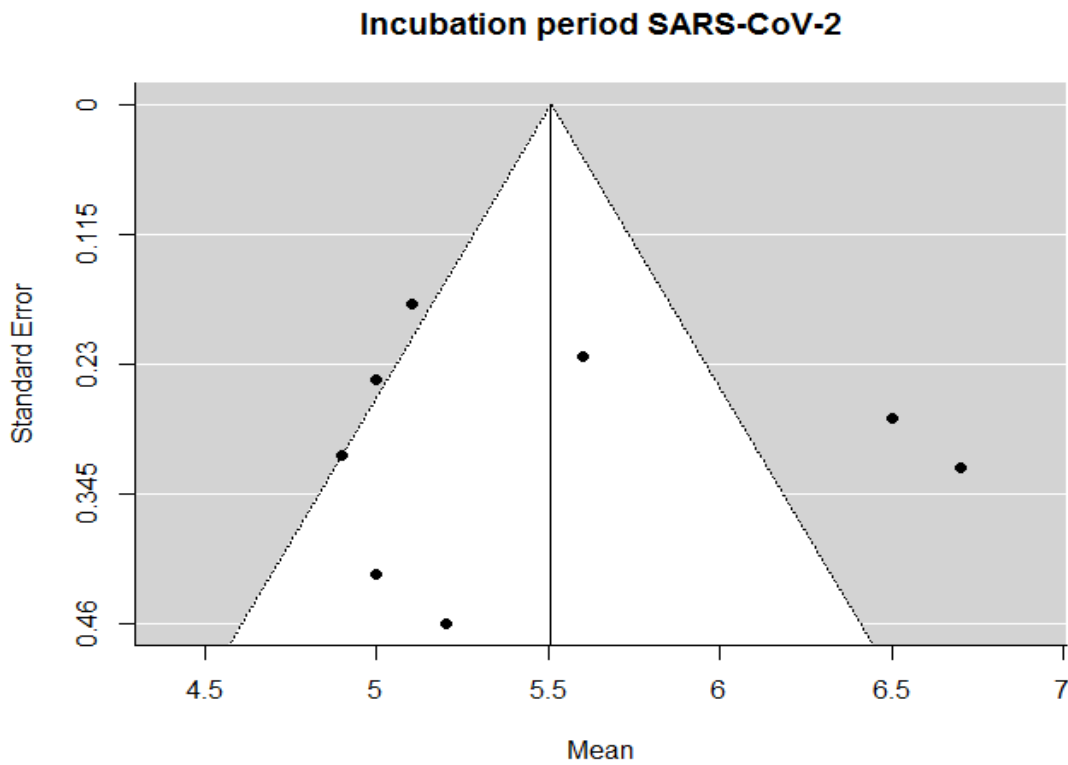

Figure S2. Funnel plot for assessing reporting bias for the 95%tile of the incubation period distribution

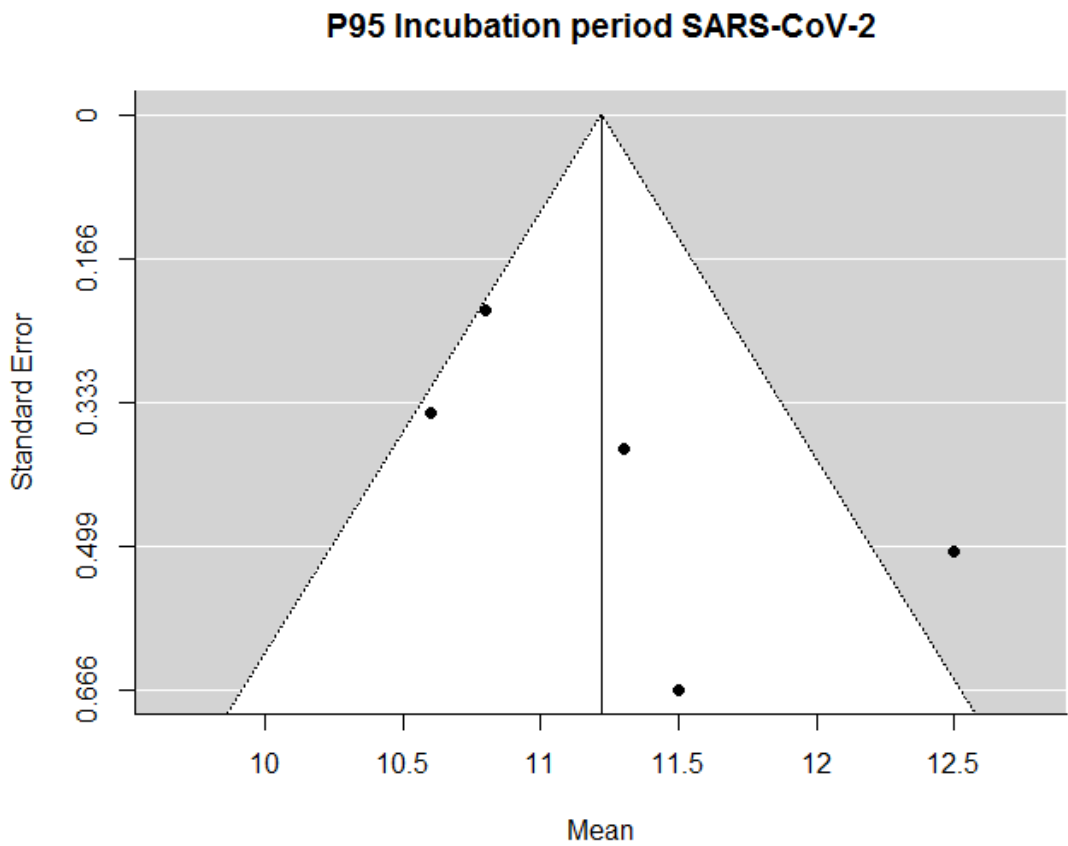

Supplement: mmc1 [file S001425652030240X:mmc1.pdf]
